# Supplementary material
Source: PubMed Central journal article supplement (PMC10357902)

## Supplementary Material (1) -Search Strategy using keywords

### Example of search terms used in PubMed

| Search concept | MeSH terms and keywords                                                                                                                                                                                                                                                                                                                                                                                                                                                                                                                                                                                                                                                                                                                                                                                                                                |
|----------------|--------------------------------------------------------------------------------------------------------------------------------------------------------------------------------------------------------------------------------------------------------------------------------------------------------------------------------------------------------------------------------------------------------------------------------------------------------------------------------------------------------------------------------------------------------------------------------------------------------------------------------------------------------------------------------------------------------------------------------------------------------------------------------------------------------------------------------------------------------|
| Dementia       | "Dementia" [MeSH] OR " Alzheimer Disease " [MeSH] OR "Neurocognitive Disorders" [MeSH] "dementia" [tiab] OR " Multiinfarct Dementia" [tiab] OR " Vascular Dementia " [tiab] OR " Senile Dementia" [tiab]                                                                                                                                                                                                                                                                                                                                                                                                                                                                                                                                                                                                                                               |
| Comorbidity    | "Comorbidity"[Mesh] OR "risk factors" [MeSH] "prevalence" [MeSH] OR "epidemiology" OR [MeSH] OR "age distribution"[Mesh] OR "age of onset"[Mesh] OR "sex characteristics"[Mesh] "cardiometabolic risk factors" [MeSH] OR "hypertension" [MeSH] OR "diabetes mellitus" [MeSH] OR "alcoholism" [MeSH] OR "alcohol drinking" [MeSH] OR "dyslipidemias" [MeSH] OR "smoking" [MeSH] "tobacco use" [MeSH] OR "risk factors" [tiab] OR "health correlates" OR onset age [tiab] OR "gender role" [tiab] OR "gender differences" [tiab] OR "gender characteristics" [tiab] "cardiometabolic risk factors"[tiab] OR "hypertension" [tiab] OR "diabetes mellitus" [tiab] OR "alcohol use disorder [tiab] OR "alcohol abuse" [tiab] OR "alcohol dependent" [tiab] OR "dyslipidemias" [tiab] OR "smoking"[tiab] OR "tobacco use"[tiab] "tobacco consumption" [tiab] |
| India          | "india"[MeSH] OR "India" [tiab] OR "South-east Asia" [tiab] OR "low- and middle-income countries" [tiab]                                                                                                                                                                                                                                                                                                                                                                                                                                                                                                                                                                                                                                                                                                                                               |

**Supplementary Material (2.1) – Forest plot regarding proportion of hypertension among patients with dementia**

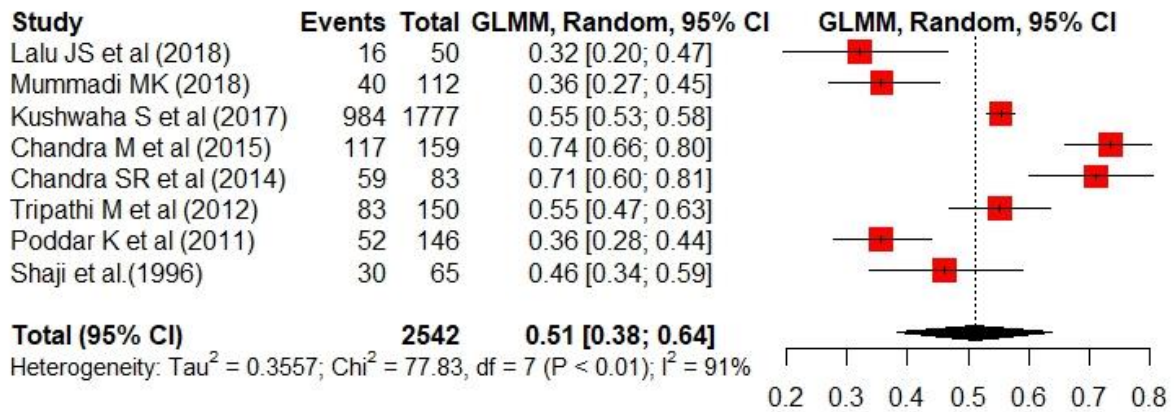

**Supplementary Material (2.2) – Forest plot regarding proportion of diabetes among patients with dementia**

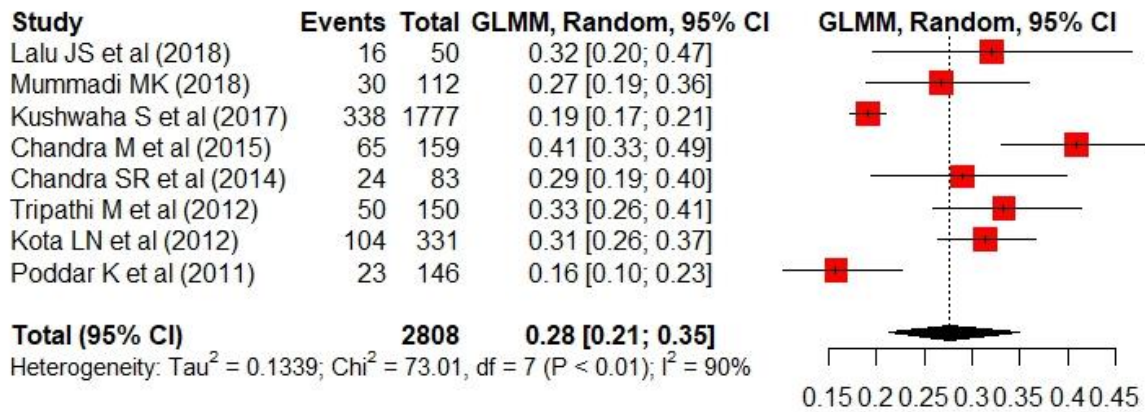

**Supplementary Material (2.3) – Forest plot regarding proportion of stroke among patients with dementia**

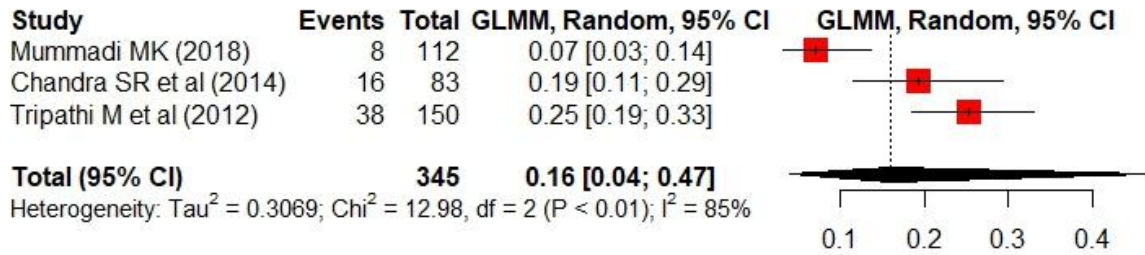

**Supplementary Material (2.4) – Forest plot regarding proportion of dyslipidemia among patients with dementia**

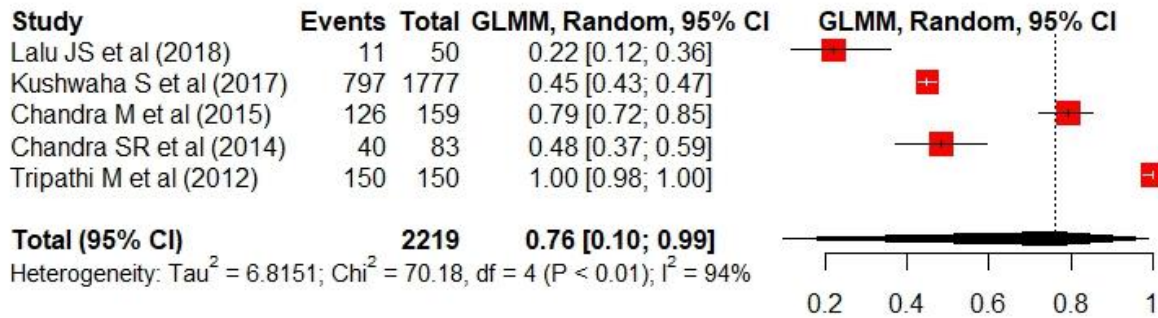

**Supplementary Material (2.5) – Forest plot regarding proportion of tobacco use among patients with dementia**

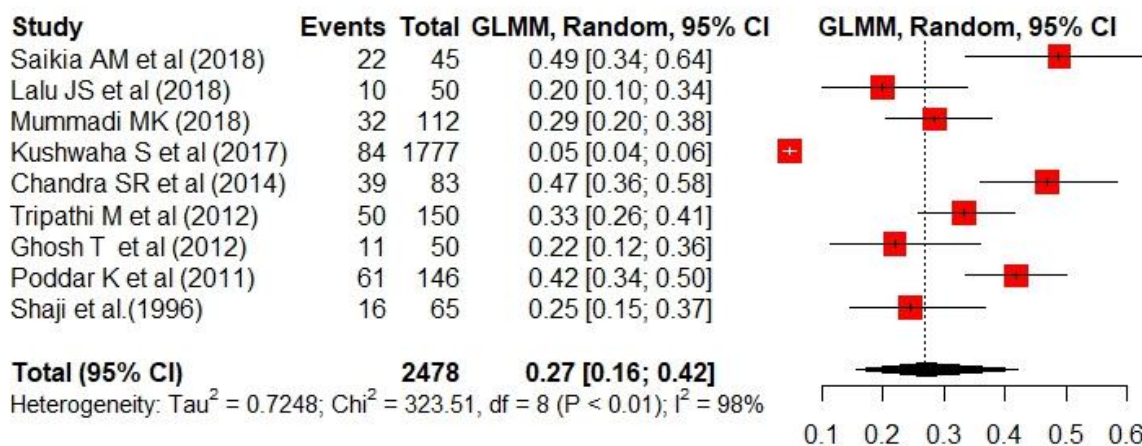

**Supplementary Material (2.6) – Forest plot regarding proportion of alcohol use among patients with dementia**

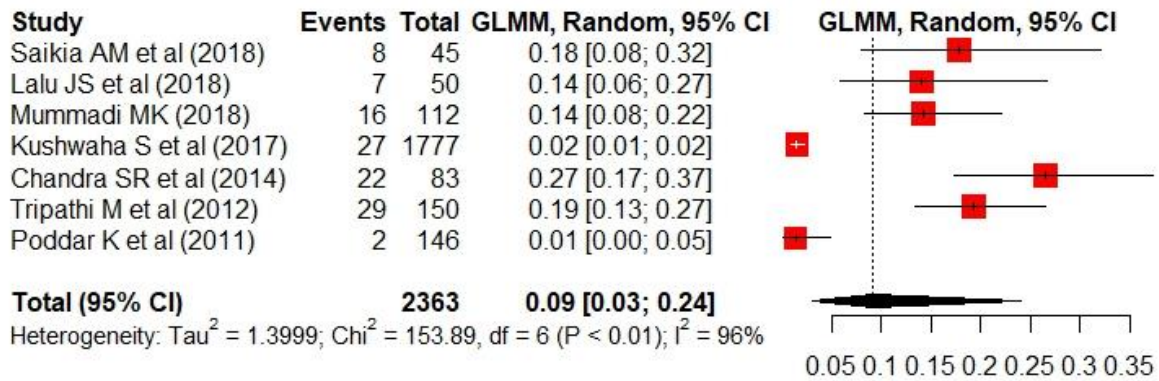

**Supplementary Material (2.7) – Forest plot regarding proportion of family history of dementia among patients with dementia**

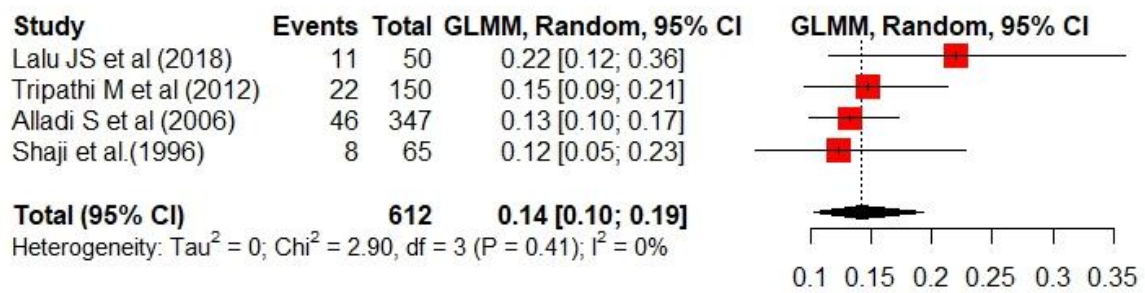

Supplement: sj-pdf-1-szj-10.1177_02537176221130252.pdf [file sj-pdf-1-szj-10.1177_02537176221130252.pdf]
